# Supplementary material for: Haplotype-based association of renin gene polymorphisms with essential hypertension in Han population of northern china
Source: PubMed Central journal article supplement — J Renin Angiotensin Aldosterone Syst. 2017 Dec 13;18(4):1470320317744917. doi: 10.1177/1470320317744917 (PMC5843929; doi:10.1177/1470320317744917), 2017-12-13
Supplement: SupplementaryTables.pdf [file SupplementaryTables.pdf]

Supplementary table 1. 25 $\mu$ L PCR reaction system

| component          | volume( $\mu$ L) | concentration       |
|--------------------|------------------|---------------------|
| DNA sample         | 1.00             | 50-100ng/ $\mu$ L   |
| primer             | 1.00             | 50 $\mu$ M/ $\mu$ L |
| dNTPs              | 1.00             | 5mM/ $\mu$ L        |
| Taq DNA polymerase | 0.25             | 5U/ $\mu$ L         |
| 10 $\times$ buffer | 2.50             |                     |
| ddH <sub>2</sub> O | 18.25            |                     |

Supplementary table 2. Conditions applied for PCRs

| Primers(Forward/Reverse)        | PCR conditions                                                  | Size (bp) |
|---------------------------------|-----------------------------------------------------------------|-----------|
| F:5'-TAGGAGATAAGGCATAGAAAGC-3'  | 95 $^{\circ}$ C -5m;(95 $^{\circ}$ C -40s,54 $^{\circ}$ C -40s, | 451       |
| R:5'-AGGGGATGCTAAGGTTTTCT-3'    | 72 $^{\circ}$ C -40s) $\times$ 30;72 $^{\circ}$ C -5m           |           |
| F:5'- TGAGGTTTCGAGTCGGCCCCCT-3' | 95 $^{\circ}$ C -5m;(95 $^{\circ}$ C -30s,67 $^{\circ}$ C -30s, | 250       |
| R:5'- TGCCCAAACATGGCCACACAT-3'  | 72 $^{\circ}$ C -30s) $\times$ 30;72 $^{\circ}$ C -5m           |           |

F, forward primer; R, reverse primer.

Supplementary table 3. The haplotype frequencies of five SNPs and the distributions between

cases and controls (the frequencies in both groups are more than 3%)

| Haplotype | case(freq) | control(freq) | $\chi^2$ | $\rho$ | OR(95% CI)       |
|-----------|------------|---------------|----------|--------|------------------|
| A-C-C-A-C | 1428(0.17) | 1391(0.45)    | 2.15     | 0.143  | 0.08(0.97, 1.20) |
| A-T-C-G-C | 376(0.12)  | 395(0.13)     | 0.26     | 0.610  | 0.96(0.83, 1.12) |
| G-C-T-G-T | 1098(0.36) | 1156(0.37)    | 1.32     | 0.250  | 0.94(0.85, 1.05) |
